# Supplementary material for: Development and characterization of a novel electrochemiluminescent reaction involving cadmium
Source: Royal Society of Chemistry journal article supplement (doi:10.1039/b004527f), 2000-01-01

Supporting Information

## Development and Characterization of a Novel Electrochemiluminescent Reaction Involving Cadmium

Christian Whitchurch, and Anthony Andrews, Department of Chemistry and Biochemistry, Ohio University, Athens, OH 45701


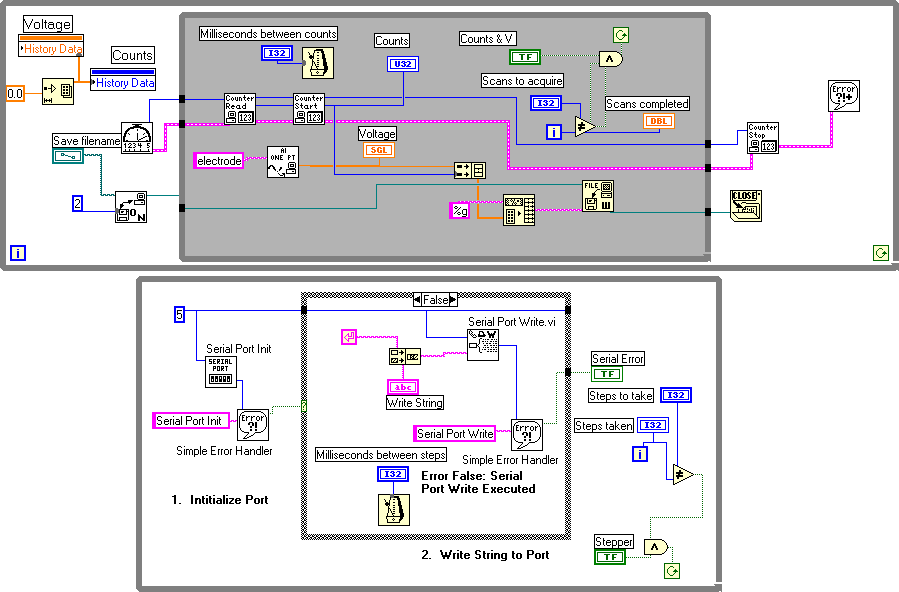

Supplement: figures.doc [file figures.doc]
